# Supplementary material for: T-Cadherin Deficiency Is Associated with Increased Blood Pressure after Physical Activity
Source: MDPI journal article supplement (doi:10.3390/ijms241814204), 2023-09-17
Supplement: s1 [file s1]

## Supplementary Materials

|    | Prd- fam (2 exon) | Pri- hex(3 exon) |
|----|-------------------|------------------|
| 1  | 27                | 26,7             |
| 2  | 28,95             |                  |
| 3  | 32,7              |                  |
| 4  | 32,8              | 40,1             |
| 5  | 27,85             | 27,25            |
| 6  | 30,1              |                  |
| 7  | 30,35             | 36,5             |
| 8  | 30,05             |                  |
| 9  | 30,35             | 33,05            |
| 10 | 39,9              |                  |
| 11 | 31,2              | 37,4             |
| 12 | 30,15             |                  |
| 13 | 33,75             | 38,2             |
| 14 | 34,6              | 37,9             |
| 15 | 25,9              |                  |
| 16 | 32,7              |                  |
| 17 | 34,85             | 37,1             |
| 18 | 35,2              |                  |
| 19 | 33,75             |                  |
| 20 | 24,85             |                  |
| 21 | 25,1              |                  |
| 22 | 24,15             |                  |
| 23 | 23,65             |                  |
| 24 | 27,45             |                  |
| 25 | 24,25             |                  |
| 26 | 24,65             |                  |
| 27 | 23,4              |                  |
| 28 | 23,6              |                  |
| 29 | 23,55             |                  |
| 30 | 26,85             |                  |
| 31 | 24,8              |                  |
| 32 | 26,2              |                  |
| 33 | 25,05             |                  |
| 34 | 26,2              |                  |
| 35 | 26,35             |                  |
| 36 | 26                |                  |
| 37 | 26                |                  |
| 38 | 26,2              |                  |
| 39 | 23,8              |                  |
| 40 | 26,9              | 26,25            |
| 41 | 28,25             | 27,7             |
| 42 | 25,8              | 24,05            |

|    |       |       |
|----|-------|-------|
| 43 | 27    | 25,2  |
| 44 | 28,55 | 27    |
| 45 | 24,25 | -     |
| 46 | 24,1  | 39    |
| 47 | 23,1  | -     |
| 48 | 23,35 | 38,8  |
| 49 | 23,8  | 39,15 |
| 50 | 24,3  | -     |
| 51 | 23,25 | -     |
| 52 | 23,45 | 38,7  |
| 53 | 27,9  | -     |
| 54 | 27,7  | -     |
| 55 | 30,9  | -     |
| 56 | 28,35 | 39,5  |
| 57 | 26    | 24,5  |
| 58 | 24,2  | 23    |
| 59 | 24,7  | 23    |
| 60 | 22,8  | 21,4  |
| 61 | 24,2  | 22,7  |
| 62 | 24    | 22,8  |
| 63 | 28    | 22,3  |

**Table S1.** Results of PCR amplification of the products corresponding to exons 2 and exon 3 in *Cdh13* gene. A total of 63 mice were examined. Amplification was detected in two channels: mice with genomic DNA being amplified in both channels (FAM and HEX) were considered to be WT, while those with amplification only in the FAM channel were considered to be T-cadherin-deficient mice lacking the 3<sup>rd</sup> exon. The *Plaur* gene, was used as a reference gene for the isolated murine genomic DNA.
